# Supplementary material for: A MUTYH germline mutation is associated with small intestinal neuroendocrine tumors
Source: PubMed Central journal article supplement (PMC5527373; doi:10.1530/erc-17-0196), 2017-06-20
Supplement: erc-24-427-s003.pdf [file erc-24-427-s003.pdf]

Supplementary Figure 3.

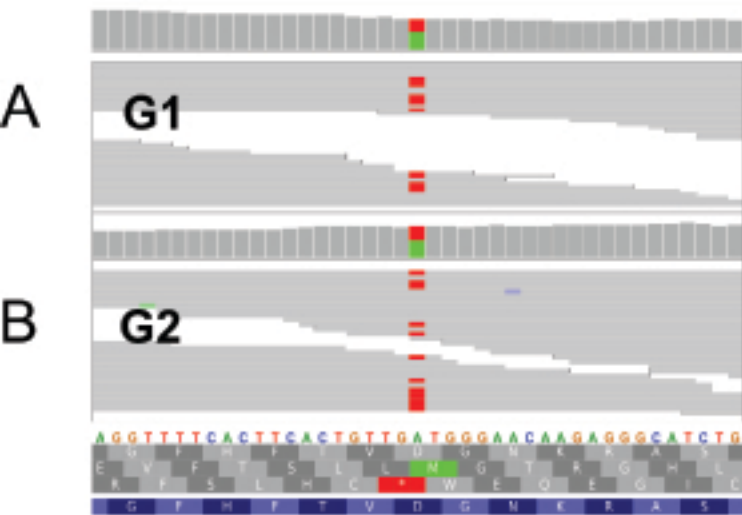

chr5:223626-223666

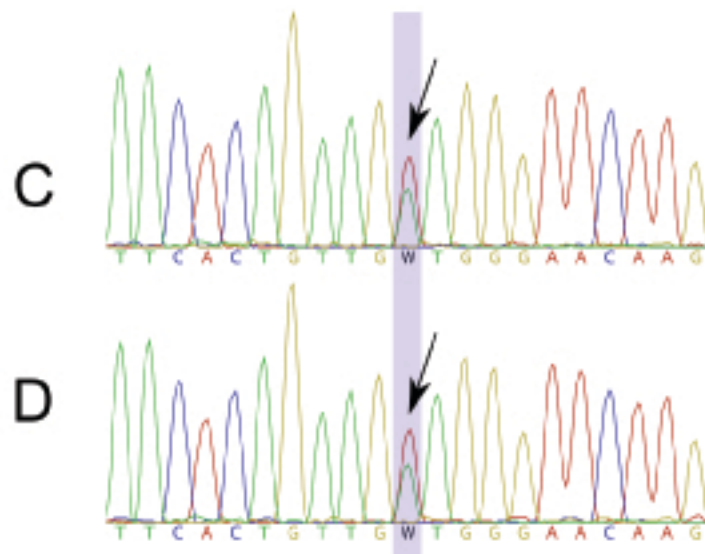

NM\_004168.3(*SDHA*):  
c.113A>T p.(Asp38Val)
