# Supplementary material for: A MUTYH germline mutation is associated with small intestinal neuroendocrine tumors
Source: PubMed Central journal article supplement (PMC5527373; doi:10.1530/erc-17-0196), 2017-06-20
Supplement: erc-24-427-t001.pdf [file erc-24-427-t001.pdf]

|    |   |            |    |       |      |        |     |     |  |     |     |
|----|---|------------|----|-------|------|--------|-----|-----|--|-----|-----|
| 37 | F | B          | 50 | <1%   | 1    | TxN1M1 | 59  | 104 |  |     |     |
| 37 | F | M (liver)  | 50 | <1%   | 1    | TxN1M1 | 59  | 104 |  |     |     |
| 37 | F | NT (liver) | 50 | <1%   | 1    | TxN1M1 | 59  | 104 |  |     |     |
| 38 | F | B          | 52 | <1%   | 1    | TxN1M1 | AWD | 214 |  |     | +/- |
| 38 | F | PT         | 52 | <1%   | 1    | TxN1M1 | AWD | 214 |  |     | +/- |
| 39 | F | B          | 57 | 1%    | 1    | TxN1M1 | 66  | 103 |  |     |     |
| 40 | F | B          | 49 | 1-2%  | 1    | TxN1M0 | AWD | 181 |  |     |     |
| 40 | F | M          | 49 | 1-2%  | 1    | TxN1M0 | AWD | 181 |  |     |     |
| 41 | M | B          | 70 | n.a.  | n.a. | TxN1M1 | AWD | 243 |  |     | +/- |
| 42 | M | B          | 38 | n.a.  | n.a. | TxN1M1 | 58  | 244 |  |     |     |
| 43 | M | B          | 40 | 4%    | 2    | TxN1M1 | 54  | 171 |  |     |     |
| 44 | M | B          | 56 | 1-2%  | 1    | TxN1M1 | AWD | 138 |  |     |     |
| 45 | M | B          | 71 | 5-10% | 2    | TxN1M1 | 72  | 18  |  |     |     |
| 46 | M | B          | 49 | <1%   | 1    | TxN1M1 | 72  | 277 |  |     |     |
| 47 | M | B          | 62 | <1%   | 1    | TxN1M1 | AWD | 154 |  |     |     |
| 48 | F | B          | 52 | 10%   | 2    | TxN1M1 | 52  | 8   |  |     |     |
| 49 | M | B          | 52 | n.a.  | n.a. | TxN1M1 | 58  | 82  |  |     | +/- |
| 50 | M | B          | 59 | n.a.  | n.a. | TxN1M1 | 70  | 126 |  |     |     |
| 51 | M | B          | 66 | n.a.  | n.a. | TxN1M0 | AWD | 156 |  | +/- |     |
| 52 | M | B          | 68 | 1%    | 1    | TxN1M1 | AWD | 141 |  |     |     |
| 53 | M | B          | 61 | 2%    | 1    | TxN1M0 | AWD | 140 |  |     |     |
| 54 | M | B          | 66 | n.a.  | n.a. | TXn1m0 | 74  | 101 |  |     |     |
| 55 | F | B          | 67 | 1%    | 1    | TxN1M1 | AWD | 178 |  |     |     |
| 55 | F | NT         | 67 | 1%    | 1    | TxN1M1 | AWD | 178 |  |     |     |
| 55 | F | PT         | 67 | 1%    | 1    | TxN1M1 | AWD | 178 |  |     |     |
| 56 | M | B          | 25 | n.a.  | n.a. | TxN1M1 | AWD | 236 |  |     | +/- |
| 56 | M | PT         | 25 | n.a.  | n.a. | TxN1M1 | AWD | 236 |  |     | +/- |
| 57 | M | B          | 52 | 1%    | 1    | TxN1M1 | AWD | 176 |  |     |     |
| 58 | F | B          | 40 | 1%    | 1    | TxN1M1 | AWD | 183 |  |     |     |
| 59 | F | B          | 84 | 1%    | 1    | TxN1M0 | AWD | 150 |  |     |     |
| 60 | F | B          | 77 | 3%    | 2    | TxN1M1 | AWD | 123 |  | +/- |     |
| 61 | F | B          | 76 | 2%    | 1    | TxN1M0 | 84  | 99  |  |     |     |
| 62 | F | B          | 59 | <1%   | 1    | TxN1M1 | 72  | 152 |  |     |     |
| 62 | F | M (meso)   | 59 | <1%   | 1    | TxN1M1 | 72  | 152 |  |     |     |
| 64 | F | B          | 52 | 1%    | 1    | TxN1M1 | AWD | 141 |  |     |     |
| 64 | F | M (liver)  | 52 | 1%    | 1    | TxN1M1 | AWD | 141 |  |     |     |
| 65 | M | B          | 49 | 1%    | 1    | TxN1M1 | AWD | 161 |  |     |     |
| 66 | F | B          | 59 | 5%    | 2    | TxN1M1 | 69  | 120 |  |     |     |
| 67 | F | B          | 42 | 2%    | 1    | TxN1M1 | 58  | 193 |  |     |     |
| 68 | M | B          | 62 | 5%    | 2    | TxN1M1 | 81  | 235 |  |     | +/- |
| 68 | M | M (liver)  | 62 | 5%    | 2    | TxN1M1 | 81  | 235 |  |     | +/- |
| 69 | F | B          | 49 | 2%    | 1    | TxN1M0 | AWD | 137 |  |     | +/- |
| 70 | M | B          | 59 | <1%   | 1    | TxN1M1 | 68  | 111 |  |     |     |
| 72 | F | B          | 66 | n.a.  | n.a. | TxN1M0 | 82  | 196 |  |     | +/- |
| 73 | F | B          | 38 | n.a.  | n.a. | TxN1M0 | 58  | 232 |  |     |     |
| 74 | M | B          | 56 | n.a.  | n.a. | TxN1M0 | AWD | 220 |  |     | +/- |
| 75 | M | B          | 54 | 1-2%  | 1    | TxN1M1 | AWD | 182 |  |     | +/- |
| 75 | M | M          | 54 | 1-2%  | 1    | TxN1M1 | AWD | 182 |  |     | +/- |
| 76 | M | B          | 46 | 1%    | 1    | TxN1M0 | AWD | 160 |  |     | +/- |

|     |   |            |      |      |      |        |      |      |      |      |
|-----|---|------------|------|------|------|--------|------|------|------|------|
| 77  | M | B          | 78   | 5%   | 2    | TxN1M0 | 85   | 82   |      |      |
| 78  | M | B          | 57   | 1%   | 1    | TxN1M1 | 73   | 194  |      |      |
| 79  | F | B          | 65   | 1%   | 1    | TxN1M0 | 68   | 35   |      |      |
| 80  | M | B          | 46   | 1-2% | 1    | TxN1M1 | 54   | 102  |      |      |
| 81  | F | B          | 59   | 0.5% | 1    | TxN1M0 | AWD  | 141  |      |      |
| 82  | F | B          | 57   | 1%   | 1    | TxN1M0 | AWD  | 123  |      |      |
| 83  | M | B          | 56   | <3%  | 2    | TxN1M1 | 64   | 93   |      |      |
| 84  | F | B          | 78   | 6%   | 2    | TxN1M0 | 80   | 25   |      |      |
| 85  | M | B          | 54   | 6-9% | 2    | TxN1M1 | 61   | 90   |      |      |
| 86  | F | B          | 46   | 1%   | 1    | TxN1M1 | 66   | 235  |      |      |
| 87  | M | B          | 59   | 2-3% | 1    | TxN1M0 | AWD  | 177  |      |      |
| 88  | M | B          | 47   | 1%   | 1    | TxN0M0 | 51   | 51   |      |      |
| 89  | M | B          | 62   | 1%   | 1    | TxN1M1 | 74   | 141  |      |      |
| 90  | F | B          | 72   | <1%  | 1    | TxN1M0 | 83   | 135  |      | +/-  |
| 91  | F | B          | 72   | 1%   | 1    | TxN1M0 | 84   | 142  |      |      |
| 92  | F | B          | 68   | n.a. | n.a. | TxN1M0 | AWD  | 231  |      |      |
| 93  | M | B          | 64   | 0.1% | 1    | TxN0M1 | AWD  | 135  |      | +/-  |
| 94  | F | B          | 51   | 2-3% | 2    | TxN1M0 | AWD  | 133  |      |      |
| 95  | M | B          | 42   | 1-2% | 1    | TxN1M1 | AWD  | 139  |      |      |
| 96  | F | B          | 45   | 1%   | 1    | TxN1M1 | AWD  | 172  |      |      |
| 97  | F | B          | 67   | 1%   | 1    | TxN1M1 | 80   | 155  |      |      |
| 97  | F | M (liver)  | 67   | 1%   | 1    | TxN1M1 | 80   | 155  |      |      |
| 97  | F | NT         | 67   | 1%   | 1    | TxN1M1 | 80   | 155  |      |      |
| 97  | F | PT         | 67   | 1%   | 1    | TxN1M1 | 80   | 155  |      |      |
| 98  | F | B          | 72   | 1%   | 1    | TxN1M1 | AWD  | 132  |      | +/-  |
| 99  | M | B          | 53   | 1%   | 1    | TxN1M1 | AWD  | 204  |      |      |
| 100 | M | B          | 67   | 1%   | 1    | TxN1M1 | AWD  | 127  |      | +/-  |
| 101 | F | B          | 72   | n.a. | n.a. | TxN1M1 | 86   | 168  |      |      |
| 102 | F | B          | 60   | 2%   | 1    | TxN1M1 | 68   | 101  |      |      |
| 104 | F | M          | 44   | n.a. | n.a. | TxN1M1 | 60   | 197  |      |      |
| 105 | M | M (liver)  | n.a. | n.a. | n.a. | n.a.   | n.a. | n.a. | +/-  | +/-  |
| 106 | F | M (liver)  | 48   | n.a. | n.a. | TxN1M0 | 60   | 143  |      |      |
| 107 | F | PT         | 62   | n.a. | n.a. | TxN1M1 | 73   | 130  |      |      |
| 108 | M | PT         | 78   | n.a. | n.a. | TxN1M1 | 81   | 45   |      |      |
| 109 | M | M (liver)  | 57   | n.a. | n.a. | TxN1M1 | 60   | 45   |      |      |
| 110 | F | PT         | 63   | n.a. | n.a. | TxN1M1 | 66   | 36   |      |      |
| 111 | M | PT         | 90   | n.a. | n.a. | TxN1M0 | 104  | 167  |      | +/-  |
| 112 | M | NT         | 58   | n.a. | n.a. | TxN1M1 | AWD  | 374  |      |      |
| 112 | M | PT         | 58   | n.a. | n.a. | TxN1M1 | AWD  | 374  | n.a. | n.a. |
| 113 | F | PT         | 61   | n.a. | n.a. | TxN1M1 | 67   | 78   |      | +/-  |
| 115 | F | PT         | 69   | n.a. | n.a. | TxN1M0 | 72   | 34   |      |      |
| 116 | M | NT         | 56   | 6%   | 2    | TxN1M1 | 67   | 134  |      |      |
| 116 | M | PT         | 56   | 6%   | 2    | TxN1M1 | 67   | 134  |      |      |
| 117 | M | NT (liver) | 70   | n.a. | n.a. | TxN1M1 | 84   | 159  |      |      |
| 117 | M | PT         | 70   | n.a. | n.a. | TxN1M1 | 84   | 159  |      |      |
| 118 | F | PT         | 61   | n.a. | n.a. | TxN1M1 | 76   | 177  |      |      |
| 121 | M | M          | n.a. | n.a. | n.a. | n.a.   | n.a. | n.a. |      |      |
| 122 | M | PT         | 75   | n.a. | n.a. | TxN1M0 | 87   | 143  |      |      |
| 123 | F | M (liver)  | 67   | n.a. | n.a. | TxN1M1 | 72   | 63   |      |      |

|     |   |             |      |      |      |        |      |      |      |      |
|-----|---|-------------|------|------|------|--------|------|------|------|------|
| 124 | F | M           | 59   | n.a. | n.a. | TxN1M1 | 58   | 1    | +/-  |      |
| 125 | F | NT (liver)  | 46   | 1%   | 1    | TxN1M1 | AWD  | 264  |      |      |
| 125 | F | PT          | 46   | 1%   | 1    | TxN1M1 | AWD  | 264  |      |      |
| 126 | M | M (liver)   | 72   | n.a. | n.a. | TxN1M1 | 80   | 98   |      |      |
| 126 | M | PT          | n.a. | n.a. | n.a. | NULL   | n.a. | n.a. |      |      |
| 127 | M | PT          | n.a. | n.a. | n.a. | NULL   | n.a. | n.a. |      |      |
| 129 | F | PT          | 65   | n.a. | n.a. | TxN1M1 | 68   | 39   |      |      |
| 130 | F | PT          | 74   | n.a. | n.a. | TxN1M1 | 75   | 12   |      | n.a. |
| 131 | F | PT          | 49   | n.a. | n.a. | TxN1M1 | 52   | 38   |      |      |
| 132 | M | M (meso)    | 76   | n.a. | n.a. | TxN1M1 | 80   | 54   |      |      |
| 134 | M | PT          | 46   | 2%   | 1    | TxN1M1 | 52   | 69   |      |      |
| 135 | M | PT          | 66   | n.a. | n.a. | TxN1M1 | 67   | 13   | +/-  | n.a. |
| 137 | F | NT          | 63   | n.a. | n.a. | TxN1M0 | 66   | 33   |      | n.a. |
| 137 | F | M (omentum) | 63   | n.a. | n.a. | TxN1M0 | 66   | 33   |      |      |
| 138 | M | M (liver)   | 41   | n.a. | n.a. | TxN1M1 | 46   | 60   |      |      |
| 138 | M | PT          | 41   | n.a. | n.a. | TxN1M1 | 46   | 60   |      |      |
| 139 | M | NT          | 69   | n.a. | n.a. | TxN0M0 | 76   | 86   | +/-  |      |
| 139 | M | PT          | 69   | n.a. | n.a. | TxN0M0 | 76   | 86   | +/-  |      |
| 141 | M | M (meso)    | 39   | 1%   | 1    | TxN1M1 | 52   | 155  |      |      |
| 143 | M | PT          | 59   | n.a. | n.a. | TxN1M1 | 62   | 39   |      |      |
| 146 | F | M (meso)    | 55   | n.a. | n.a. | TxN1M0 | AWD  | 216  |      |      |
| 147 | F | M           | 40   | 1%   | 1    | TxN1M1 | 57   | 200  |      | n.a. |
| 147 | F | NT          | 40   | 1%   | 1    | TxN1M1 | 57   | 200  |      |      |
| 148 | M | M (meso)    | 48   | 1%   | 1    | TxN1M1 | 50   | 29   |      | n.a. |
| 149 | F | ANT         | 73   | n.a. | n.a. | TxN1M1 | 87   | 167  |      |      |
| 149 | F | PT          | 73   | n.a. | n.a. | TxN1M1 | 87   | 167  |      |      |
| 151 | M | PT          | 61   | n.a. | n.a. | TxN1M1 | 70   | 102  |      |      |
| 152 | M | PT          | 70   | 1%   | 1    | TxN1M0 | 82   | 146  |      |      |
| 154 | M | M (liver)   | 64   | n.a. | n.a. | TxN1M0 | 81   | 210  |      |      |
| 154 | M | NT (liver)  | 64   | n.a. | n.a. | TxN1M0 | 81   | 210  |      |      |
| 155 | M | M (meso)    | 69   | 1%   | 1    | TxN1M1 | 71   | 28   |      | +/-  |
| 156 | F | PT          | 60   | n.a. | n.a. | TxN1M1 | 63   | 32   |      |      |
| 161 | F | PT          | 70   | n.a. | n.a. | TxN1M1 | 76   | 66   |      |      |
| 165 | M | PT          | 71   | <1%  | 1    | TxN1M0 | 74   | 115  |      |      |
| 166 | F | PT          | 44   | 1%   | 1    | TxN1M1 | AWD  | 224  |      |      |
| 168 | F | PT          | 68   | 20%  | 2    | TxN1M1 | 70   | 34   |      |      |
| 169 | M | PT          | 70   | <1%  | 1    | TxN1M1 | 74   | 51   |      |      |
| 170 | F | PT          | 74   | 1%   | 1    | TxN1M1 | 88   | 163  |      |      |
| 171 | M | PT          | 51   | 3%   | 2    | TxN1M1 | 64   | 148  |      |      |
| 173 | M | M (liver)   | 52   | n.a. | n.a. | TxN1M1 | 56   | 51   |      |      |
| 173 | M | NT          | 52   | n.a. | n.a. | TxN1M1 | 56   | 51   |      |      |
| 175 | F | M (ovaries) | 78   | 1%   | 1    | TxN1M1 | 78   | 2    |      |      |
| 176 | M | M (meso)    | 67   | <1%  | 1    | TxN1M1 | AWD  | 161  |      |      |
| 176 | M | NT (liver)  | 67   | <1%  | 1    | TxN1M1 | AWD  | 161  |      | n.a. |
| 179 | M | NT          | 57   | <1%  | 1    | TxN1M1 | AWD  | 144  | n.a. |      |
| 179 | M | PT          | 57   | <1%  | 1    | TxN1M1 | AWD  | 144  |      | n.a. |
| 180 | F | M (ovaries) | 46   | <1%  | 1    | n.a.   | 70   | 282  |      |      |
| 183 | F | M (meso)    | 66   | 1%   | 1    | TxN1M1 | AWD  | 136  |      |      |
| 184 | M | PT          | 70   | 1%   | 1    | TxN1M1 | 78   | 94   |      |      |

|     |   |                |    |      |   |        |     |     |      |      |
|-----|---|----------------|----|------|---|--------|-----|-----|------|------|
| 185 | F | M (meso)       | 57 | 1%   | 1 | TxN1M0 | 77  | 238 |      |      |
| 187 | F | PT             | 76 | 1%   | 1 | TxN1M1 | 85  | 98  |      | n.a. |
| 188 | F | M (peritoneum) | 42 | 1%   | 1 | TxN1M0 | AWD | 252 |      | n.a. |
| 191 | F | PT             | 66 | 3%   | 1 | TxN1M1 | 69  | 34  |      | n.a. |
| 192 | M | M (meso)       | 70 | <1%  | 1 | TxN1M0 | 79  | 111 |      |      |
| 193 | M | M (meso)       | 46 | 1%   | 1 | TxN1M0 | AWD | 213 |      |      |
| 194 | F | NT (liver)     | 51 | 2-3% | 2 | TxN1M1 | AWD | 116 |      |      |
| 194 | F | PT             | 51 | 2-3% | 2 | TxN1M1 | AWD | 116 |      | n.a. |
| 195 | M | M (meso)       | 65 | 1%   | 1 | TxN1M1 | AWD | 114 |      |      |
| 197 | M | M              | 40 | 1%   | 1 | TxN1M0 | AWD | 154 | +/-  | n.a. |
| 198 | M | M (meso)       | 67 | 1%   | 1 | TxN1M1 | AWD | 110 |      |      |
| 199 | F | PT             | 70 | 1%   | 1 | TxN1M0 | 77  | 77  |      |      |
| 200 | M | M (meso)       | 71 | 1%   | 1 | TxN1M0 | AWD | 104 |      |      |
| 202 | M | NT (liver)     | 60 | 1-2% | 1 | TxN1M1 | AWD | 108 | +/-  |      |
| 202 | M | PT             | 60 | 1-2% | 1 | TxN1M1 | AWD | 108 | n.a. | +/-  |
| 203 | F | M              | 72 | 2-3% | 2 | TxN1M0 | 76  | 55  |      |      |
| 203 | F | NT             | 72 | 2-3% | 2 | TxN1M0 | 76  | 55  |      |      |
| 205 | F | NT             | 43 | 5%   | 2 | TxN1M1 | AWD | 100 |      |      |
| 205 | F | PT             | 43 | 5%   | 2 | TxN1M1 | AWD | 100 |      |      |
| 207 | F | NT             | 57 | 10%  | 2 | TxN1M1 | AWD | 94  |      |      |
| 207 | F | PT             | 57 | 10%  | 2 | TxN1M1 | AWD | 94  |      |      |
| 208 | M | M (meso)       | 55 | 2.5% | 1 | TxN1M0 | AWD | 89  | +/-  |      |
| 208 | M | NT             | 55 | 2.5% | 1 | TxN1M0 | AWD | 89  | +/-  |      |
| 209 | F | PT             | 72 | <1%  | 1 | TxN1M1 | AWD | 82  |      |      |
| 210 | F | M (ovaries)    | 62 | 3%   | 2 | TxN1M1 | 66  | 48  |      |      |
| 210 | F | NT             | 62 | 3%   | 2 | TxN1M1 | 66  | 48  |      |      |
| 211 | M | PT             | 72 | 1%   | 1 | TxN1M0 | AWD | 83  | +/-  |      |
| 212 | F | M (liver)      | 41 | 1%   | 1 | TxN1M1 | AWD | 84  |      |      |
| 213 | F | M (ovaries)    | 40 | 2-3% | 1 | TxN1M1 | AWD | 86  | +/-  | n.a. |
| 214 | M | ANT            | 55 | <1%  | 1 | TxN1M1 | AWD | 81  | n.a. |      |
| 214 | M | M              | 55 | <1%  | 1 | TxN1M1 | AWD | 81  |      |      |
| 215 | F | NT (pancreas)  | 72 | 2-3% | 2 | TxN1M0 | 78  | 71  | +/-  |      |
| 215 | F | PT             | 72 | 2-3% | 2 | TxN1M0 | 78  | 71  | +/-  |      |
| 217 | M | NT (liver)     | 66 | 1-3% | 2 | TxN1M0 | AWD | 77  |      |      |
| 217 | M | PT             | 66 | 1-3% | 2 | TxN1M0 | AWD | 77  |      |      |
| 218 | M | M (peritoneum) | 69 | <1%  | 1 | TxN1M1 | 77  | 89  |      | +/-  |
| 219 | M | NT (liver)     | 66 | 1%   | 1 | TxN1M1 | AWD | 74  |      |      |
| 219 | M | PT             | 66 | 1%   | 1 | TxN1M1 | AWD | 74  |      |      |
| 221 | F | NT             | 58 | 1%   | 1 | TxN1M1 | AWD | 78  |      |      |
| 221 | F | PT             | 58 | 1%   | 1 | TxN1M1 | AWD | 78  |      |      |
| 222 | M | PT             | 43 | 2%   | 1 | TxN1M1 | AWD | 74  |      |      |
| 223 | F | M (meso)       | 64 | 4%   | 2 | TxN1M1 | AWD | 94  |      |      |
| 224 | M | M (meso)       | 68 | 3%   | 2 | TxN1M0 | AWD | 66  |      |      |
| 225 | M | M              | 64 | 15%  | 2 | TxN1M1 | AWD | 73  |      |      |
| 227 | M | NT             | 68 | 2-3% | 2 | TxN1M1 | 70  | 19  |      |      |
| 227 | M | PT             | 68 | 2-3% | 2 | TxN1M1 | 70  | 19  |      |      |
| 229 | F | M (ovaries)    | 66 | 7%   | 2 | TxN1M1 | 69  | 39  |      |      |
| 230 | M | M (meso)       | 44 | 10%  | 2 | TxN1M1 | AWD | 51  |      |      |
| 232 | F | B              | 67 | 1%   | 1 | TxN1M1 | AWD | 32  |      |      |

|     |   |              |    |      |   |        |     |     |      |      |
|-----|---|--------------|----|------|---|--------|-----|-----|------|------|
| 232 | F | NT           | 67 | 1%   | 1 | TxN1M1 | AWD | 32  |      |      |
| 233 | M | B            | 67 | 2%   | 1 | TxN1M1 | AWD | 34  |      |      |
| 233 | M | M (meso)     | 67 | 2%   | 1 | TxN1M1 | AWD | 34  |      |      |
| 233 | M | NT (liver)   | 67 | 2%   | 1 | TxN1M1 | AWD | 34  |      |      |
| 233 | M | PT           | 67 | 2%   | 1 | TxN1M1 | AWD | 34  |      |      |
| 235 | M | B            | 59 | 2.7% | 2 | TxN1M1 | AWD | 33  |      |      |
| 235 | M | PT           | 59 | 2.7% | 2 | TxN1M1 | AWD | 33  | n.a. | n.a. |
| 236 | M | B            | 59 | 1%   | 1 | TxN1M1 | AWD | 32  |      |      |
| 236 | M | M (meso)     | 59 | 1%   | 1 | TxN1M1 | AWD | 32  |      |      |
| 236 | M | NT (liver)   | 59 | 1%   | 1 | TxN1M1 | AWD | 32  |      |      |
| 236 | M | PT           | 59 | 1%   | 1 | TxN1M1 | AWD | 32  |      |      |
| 238 | M | B            | 68 | 17%  | 2 | TxN1M0 | AWD | 29  |      |      |
| 238 | M | M (meso)     | 68 | 17%  | 2 | TxN1M0 | AWD | 29  |      |      |
| 238 | M | PT           | 68 | 17%  | 2 | TxN1M0 | AWD | 29  |      |      |
| 239 | F | B            | 53 | 15%  | 2 | TxN1M1 | AWD | 28  |      |      |
| 239 | F | M (omentum)  | 53 | 15%  | 2 | TxN1M1 | AWD | 28  |      |      |
| 239 | F | PT           | 53 | 15%  | 2 | TxN1M1 | AWD | 28  |      |      |
| 240 | M | B            | 71 | 2-3% | 2 | TxN1M0 | AWD | 29  |      |      |
| 240 | M | M (meso)     | 71 | 2-3% | 2 | TxN1M0 | AWD | 29  |      |      |
| 240 | M | PT           | 71 | 2-3% | 2 | TxN1M0 | AWD | 29  |      |      |
| 241 | M | B            | 71 | 6%   | 2 | TxN1M1 | AWD | 28  |      |      |
| 241 | M | PT           | 71 | 6%   | 2 | TxN1M1 | AWD | 28  | +/-  | +/-  |
| 242 | F | B            | 23 | 1%   | 1 | TxN1M1 | AWD | 28  |      |      |
| 242 | F | PT           | 23 | 1%   | 1 | TxN1M1 | AWD | 28  |      | n.a. |
| 243 | F | B            | 66 | <1%  | 1 | TxN1M1 | AWD | 176 |      |      |
| 243 | F | M (ovaries)  | 66 | <1%  | 1 | TxN1M1 | AWD | 176 |      |      |
| 244 | M | B            | 60 | 4%   | 2 | TxN1M1 | AWD | 30  |      |      |
| 244 | M | M (liver)    | 60 | 4%   | 2 | TxN1M1 | AWD | 30  |      |      |
| 244 | M | PT           | 60 | 4%   | 2 | TxN1M1 | AWD | 30  |      |      |
| 245 | M | B            | 61 | <1%  | 1 | TxN1M1 | AWD | 26  |      |      |
| 245 | M | M (appendix) | 61 | <1%  | 1 | TxN1M1 | AWD | 26  | n.a. |      |
| 245 | M | PT           | 61 | <1%  | 1 | TxN1M1 | AWD | 26  |      |      |
| 246 | F | B            | 63 | <1%  | 1 | TxN1M1 | 65  | 30  |      |      |
| 246 | F | PT           | 63 | <1%  | 1 | TxN1M1 | 65  | 30  | n.a. |      |
| 247 | M | B            | 78 | 3%   | 2 | TxN1M1 | AWD | 49  |      |      |
| 247 | M | PT           | 78 | 3%   | 2 | TxN1M1 | AWD | 49  | n.a. |      |
| 249 | M | B            | 61 | 5%   | 2 | TxN1M1 | AWD | 43  |      |      |
| 249 | M | PT           | 61 | 5%   | 2 | TxN1M1 | AWD | 43  | n.a. |      |
| 250 | M | B            | 75 | 3%   | 2 | TxN1M0 | AWD | 36  |      |      |
| 250 | M | PT           | 75 | 3%   | 2 | TxN1M0 | AWD | 36  | n.a. |      |
| 251 | M | B            | 68 | <1%  | 1 | TxN1M0 | AWD | 34  |      |      |
| 251 | M | PT           | 68 | <1%  | 1 | TxN1M0 | AWD | 34  | n.a. |      |
| 252 | M | B            | 73 | <1%  | 1 | TxN1M0 | 74  | 9   | n.a. |      |
| 252 | M | PT           | 73 | <1%  | 1 | TxN1M0 | 74  | 9   | n.a. | n.a. |
| 253 | M | B            | 58 | 3%   | 2 | TxN1M1 | AWD | 30  |      |      |
| 253 | M | PT           | 58 | 3%   | 2 | TxN1M1 | AWD | 30  | n.a. |      |
| 254 | M | B            | 64 | 2.4% | 1 | TxN1M0 | AWD | 28  | +/-  |      |
| 254 | M | PT           | 64 | 2.4% | 1 | TxN1M0 | AWD | 28  | +/-  | n.a. |
| 255 | F | B            | 68 | 3.2% | 2 | TxN1M1 | AWD | 26  |      |      |

|     |   |    |    |      |   |        |     |    |      |
|-----|---|----|----|------|---|--------|-----|----|------|
| 255 | F | PT | 68 | 3.2% | 2 | TxN1M1 | AWD | 26 | n.a. |
| 256 | M | B  | 58 | 5%   | 2 | TxN1M1 | AWD | 22 |      |
| 256 | M | PT | 58 | 5%   | 2 | TxN1M1 | AWD | 22 | n.a. |
| 257 | F | B  | 75 | <1%  | 1 | TxN1M1 | AWD | 26 | +/-  |
| 257 | F | PT | 75 | <1%  | 1 | TxN1M1 | AWD | 26 | n.a. |
| 258 | F | B  | 59 | 5%   | 2 | TxN1M1 | AWD | 24 |      |
| 259 | F | PT | 60 | 9%   | 2 | TxN1M1 | 62  | 20 |      |

n.a. - data not available

<sup>a</sup> Same IDs denotes different samples taken from the same patient.

<sup>b</sup> Abbreviations: B, blood; NT, normal tissue; PT, primary tumor; M, metastasis. The specific tissue used for extraction of DNA for normal tissue and metastases, whenever available, is specified in parentheses.

<sup>c</sup> Antigen Ki-67 is an important marker for cellular proliferation and mitotic activity, predictor of SI-NET behavior and patient survival (Sokmensuer C, Gedikoglu G, Uzunalimoglu B. Importance of proliferation markers in gastrointestinal carcinoid tumors: a clinicopathologic study. Hepato-gastroenterol. 2001;48:720–723).

<sup>d</sup> Grade of tumor according to the World Health Organization (WHO) classification (WHO Classification of Tumours of the Digestive System, WHO/IARC Classification of Tumours, 4th Edition, Volume 3).

<sup>e</sup> Tumors classified according to the AJCC Cancer Staging Manual (7th ed.), 2009.

<sup>f</sup> AWD - Alive with disease

<sup>g</sup> +/- denotes the presence of the variant in only one of the two alleles. All candidate SNPs tested in the sporadic SI-NETs cohort were in fact heterozygous.
